# Supplementary material for: Tailored Immunogens Direct Affinity Maturation toward HIV Neutralizing Antibodies
Source: PubMed Central journal article supplement (PMC5018249; doi:10.1016/j.cell.2016.08.005), 2016-09-08
Supplement: mmc1.pdf [file mmc1.pdf]

## Supplemental Information

### Tailored Immunogens Direct Affinity Maturation toward HIV Neutralizing Antibodies

**Bryan Briney, Devin Sok, Joseph G. Jardine, Daniel W. Kulp, Patrick Skog, Sergey Menis, Ronald Jacak, Oleksandr Kalyuzhniy, Natalia de Val, Fabian Sesterhenn, Khoa M. Le, Alejandra Ramos, Meaghan Jones, Karen L. Saye-Francisco, Tanya R. Blane, Skye Spencer, Erik Georgeson, Xiaozhen Hu, Gabriel Ozorowski, Yumiko Adachi, Michael Kubitz, Anita Sarkar, Ian A. Wilson, Andrew B. Ward, David Nemazee, Dennis R. Burton, and William R. Schief**

**Table S1. Related to Figure 1. Purpose of GT3 mutations.**

| <b>Mutation in GT3</b> | <b>Purpose</b>                                                        | <b>Mutation in GT6?</b> | <b>Mutation in GT8?</b> |
|------------------------|-----------------------------------------------------------------------|-------------------------|-------------------------|
| N276D                  | Eliminate 276 glycan                                                  | Y                       | Y                       |
| I277F                  | Stabilize loop D for VRC01-class binding                              | Y                       | Y                       |
| T278R                  | Stabilize loop D; possible VRC01-class contact                        | Y                       | Y                       |
| F353Y                  | Improve packing behind loop D                                         | N                       | Y                       |
| N356D                  | Eliminate glycosylation site introduced by I358T                      | N                       | N                       |
| I358T                  | Improve packing on $\beta$ -sheet; not VRC01 contact                  | Y                       | Y                       |
| N363P                  | Eliminate 363 glycan in BG505 that is uncommon in other HIV strains   | N <sup>#</sup>          | Y                       |
| T372M                  | Stabilize CD4-binding loop?                                           | N                       | N                       |
| T373N                  | Add glycosylation site at position 373                                | N                       | Y                       |
| T455V                  | Eliminate partially buried and unsatisfied hydroxyl? Possible contact | N                       | N                       |
| S460Y                  | Stabilize V5? Possible VRC01-class contact                            | N                       | Y                       |
| T464N                  | Eliminate the one V5 glycan in BG505                                  | N*                      | N*                      |

<sup>#</sup>GT6 lacks a glycan at 363 although it does not use P at that position.

\*All V5 glycans have been removed from GT6 and GT8, by other mutations.

**Table S2. Related to Figure 1. Antigenic profile of GT3 SOSIP and native-like trimers**

Table of monovalent binding affinities as measured by SPR using Fabs as analytes and BG505 SOSIP, BG505 GT3 SOSIP, CD4bs-B SOSIP and CD4bs-C SOSIP as ligands.

Dissociation constant Kd (nM)

|                                         | Mat-VRC01 | GL-VRC01 | Mat-12A12 | GL-12A12 | Mat-CH31 | GL-CH31 | Mat-3BNC60 | Mat-PGV04 | PGT145 <sup>a</sup> | PGT151 | PGT121 | PGT128 | 35O22 |
|-----------------------------------------|-----------|----------|-----------|----------|----------|---------|------------|-----------|---------------------|--------|--------|--------|-------|
| <b>BG505 SOSIP</b>                      | 122       | NB       | 59        | NB       | 137      | NB      | 62         | 197       | 6                   | 25*    | 29     | 12     | 276   |
| <b>BG505 N276D-SOSIP</b> <sup>b</sup>   | 41        | -        | 9         | -        | 69       | -       | 11         | 67        | -                   | 234    | 26     | 12     | 30    |
| <b>GT3 SOSIP</b>                        | 27*       | 290      | 19*       | 1500     | 38*      | 2400*   | 23*        | 70*       | 3.7                 | 39*    | 40     | 20     | 411   |
| <b>CD4bs-B N276D-SOSIP</b> <sup>b</sup> | 43        | -        | 12        | -        | 811      | -       | 33         | 165       | 27                  | 263    | 19     | 11     | 37    |
| <b>CD4bs-C N276D-SOSIP</b> <sup>b</sup> | 170       | -        | 212       | -        | 3200     | -       | 10000      | 17000     | 18                  | 214    | 20     | 10     | 25    |

\* complex kinetics are poor fit to simple 1-to-1 binding model

<sup>a</sup> binding determined using IgG

<sup>b</sup> made in HEK 293S (-GnTI) cells

NB: no binding detected at  $\geq 4\mu\text{M}$

**Table S3. Related to Figure 3. L-CDR1 characteristics for selected VRC01-class bnAbs.**

| Antibody | VK/VL gene          | L-CDR1 sequence* |          | L-CDR1 length |        | LCDR1 deletion? |
|----------|---------------------|------------------|----------|---------------|--------|-----------------|
|          |                     | germline         | mature   | germline      | mature |                 |
| 12A12    | VK1D-33             | QDISNY           | QGIGSS   | 6             | 6      | No              |
| 12A21    | VK1D-33             | QDISNY           | QGIGSS   | 6             | 6      | No              |
| 3BNC117  | VK1D-33             | QDISNY           | GY       | 6             | 2      | Yes: 4aa        |
| 3BNC60   | VK1D-33             | QDISNY           | GY       | 6             | 2      | Yes: 4aa        |
| VRC-CH31 | VK1D-33             | QDISNY           | RGIGKD   | 6             | 6      | No              |
| NIH45-46 | VK3-20              | QSVSSSY          | QSGS     | 7             | 4      | Yes: 3aa        |
| PGV19    | VL2-14              | SDVGGYNY         | SDFRGFSS | 8             | 8      | No              |
| PGV20    | VL2-14              | SDVGGYNY         | STSV     | 8             | 4      | Yes: 4aa        |
| PGV04    | VK3-20              | QSVSSSY          | SYGH     | 7             | 4      | Yes: 3aa        |
| VRC01    | VK3-20              | QSVSSSY          | QYGS     | 7             | 4      | Yes: 3aa        |
| VRC18    | VK3-20 <sup>a</sup> | QSVSSSY          | QGILSNQ  | 7             | 7      | No              |
| VRC03    | VK3-20              | QSVSSSY          | QGGNA    | 7             | 5      | Yes: 2aa        |
| VRC06    | VK3-20              | QSVSSSY          | QGGNS    | 7             | 5      | Yes: 2aa        |
| VRC23    | VK3-15 <sup>b</sup> | QSVSSN           | QGVGSD   | 6             | 6      | No              |

\*IMGT convention for kappa or lambda chains: L-CDR1 is the stretch between CXXX and XXW.

<sup>a</sup>Georgiev et al., 2013

<sup>b</sup>Zhou et al., 2015

**Table S4. Related to Figure 5. Primers used for antibody gene amplification.**

| Round | Chain  | Direction | Sequence                                                                                          |
|-------|--------|-----------|---------------------------------------------------------------------------------------------------|
| 1     | Heavy  | Forward   | GAGGTGCAGCTGCAGGAGTCTGG                                                                           |
| 1     | Heavy  | Forward   | CAGGTGCAGCTGGTGCAG                                                                                |
| 1     | Heavy  | Reverse   | AGGGGGCTCTCGCAGGAGACGAGG                                                                          |
| 1     | Heavy  | Reverse   | GGAAGGTGTGCACACCCTGGAC                                                                            |
| 1     | Heavy  | Reverse   | GGAAGGTGTGCACACCACTGGAC                                                                           |
| 1     | Heavy  | Reverse   | GGAAGGTGTGCACACTGCTGGAC                                                                           |
| 1     | Heavy  | Reverse   | AGACTGTGCGCACACCCTGGAC                                                                            |
| 1     | Heavy  | Reverse   | GAAAGTTCACGGTGGTTATATCC                                                                           |
| 1     | Kappa  | Forward   | TGCTGCTGCTCTGGGTTCCAG                                                                             |
| 1     | Kappa  | Forward   | ATTWTCAGCTTCTGCTAATC                                                                              |
| 1     | Kappa  | Forward   | TTTTCGCTTTTCTGGATTYAG                                                                             |
| 1     | Kappa  | Forward   | TCGTGTTKCTSTGGTTGCTG                                                                              |
| 1     | Kappa  | Forward   | ATGGAATCACAGRCYCWGGT                                                                              |
| 1     | Kappa  | Forward   | TCTGTTGCTCTGGTTYCCAG                                                                              |
| 1     | Kappa  | Forward   | CAGTTCCTGGGGCTCTTGTGTTC                                                                           |
| 1     | Kappa  | Forward   | CTCACTAGCTCTTCTCCTC                                                                               |
| 1     | Kappa  | Reverse   | GATGGTGGGAAGATGGATAAGTT                                                                           |
| 1     | Lambda | Forward   | CAGGCTGTTGTGACTCAG                                                                                |
| 1     | Lambda | Forward   | CAACTTGTGCTCACTCAG                                                                                |
| 1     | Lambda | Reverse   | GTACCATYTGCTTCCAGKCCACT                                                                           |
| 2     | Heavy  | Forward   | CATCCTTTTTCTAGTAGCAACTGCAACCGGTGTACATTCCCAGGTGCAGCTGGTGCAGTCTGG                                   |
| 2     | Heavy  | Forward   | CATCCTTTTTCTAGTAGCAACTGCAACCGGTGTACATTCCGAGGTGCAGCTGCAGGAGTCTGG                                   |
| 2     | Heavy  | Reverse   | GGAAGACCGATGGGCCCCTTGGTCGACGCTGAGGAGACGGTGACCGTGG                                                 |
| 2     | Heavy  | Reverse   | GGAAGACCGATGGGCCCCTTGGTCGACGCTGAGGAGACTGTGAGAGTGG                                                 |
| 2     | Heavy  | Reverse   | GGAAGACCGATGGGCCCCTTGGTCGACGCTGCAGAGACAGTGACCAGAG                                                 |
| 2     | Heavy  | Reverse   | GGAAGACCGATGGGCCCCTTGGTCGACGCTGAGGAGACGGTGACTGAGG                                                 |
| 2     | Heavy  | Reverse   | GGAAGACCGATGGGCCCCTTGGTCGACGCTGAGGAGACGGTGACCAGGG                                                 |
| 2     | Kappa  | Forward   | CATCCTTTTTCTAGTAGCAACTGCAACCGGTGTACATTCCGAYATTGTGMTSACMCARWCTMCA                                  |
| 2     | Kappa  | Reverse   | GAAGACAGATGGTGCAGCCACCGTACGTTTGATTTCAGCTTGGTG                                                     |
| 2     | Kappa  | Reverse   | GAAGACAGATGGTGCAGCCACCGTACGTTTATTTCCAGCTTGGTG                                                     |
| 2     | Kappa  | Reverse   | GAAGACAGATGGTGCAGCCACCGTACGTTTATTTCCAACCTTGTC                                                     |
| 2     | Kappa  | Reverse   | GAAGACAGATGGTGCAGCCACCGTACGTTTCAGCTCCAGCTTGGTG                                                    |
| 2     | Lambda | Forward   | CATCCTTTTTCTAGTAGCAACTGCACCGTTTCTGGGCCAGGCTGTTGTGACTCAG                                           |
| 2     | Lambda | Forward   | CATCCTTTTTCTAGTAGCAACTGCACCGTTTCTGGGCCAACTTGTGCTCACTCAG                                           |
| 2     | Lambda | Reverse   | GTTGGCTTGAAGCTCCTCACTCGAGAGGACAGTCACTTGGTTCC                                                      |
| 2     | Lambda | Reverse   | GTTGGCTTGAAGCTCCTCACTCGAGAGGACAGTCACTTGGTTCC                                                      |
| 2     | Lambda | Reverse   | GTTGGCTTGAAGCTCCTCACTCGAGAGGACAGTCAATCTGGTTCC                                                     |
| 3     | Heavy  | Forward   | ACACTCTTCCCTACACGACGCTCTTCCGATCTNNNNCCAGGGGAAGACCGATGGGCCCTTGGTCCA                                |
| 3     | Kappa  | Forward   | ACACTCTTCCCTACACGACGCTCTTCCGATCTNNNNCCAGGGAAGATGAAGACAGATGGTGCAGCCACCGT                           |
| 3     | Lambda | Forward   | ACACTCTTCCCTACACGACGCTCTTCCGATCTNNNNGTGGCCTTGTGGCTTGAAGCTCCTCACTCCA                               |
| 3     | All    | Reverse   | AGACGTGTGCTCTTCCGATCTXXXXXXXXXXGGTCATGTATCATCTTTTTCTAGTAGCAACTG                                   |
| 4     | All    | Forward   | CAAGCAGAAGACGGCATAACGAGATCGGCTTCGGCATTCCTGCTGAAGATXXXXXXXXXXGTGACTGGAGTT<br>CAGACGTGTGCTCTTCCGATC |
| 4     | All    | Reverse   | AATGATACGGCGACCACCGAGATCTACACTCTTCCCTACACGACGCTC                                                  |

Note: Red Xs in the Round 3 reverse primer indicate the position of well-specific barcodes. Blue Xs in the Round 4 reverse primer indicate the position of plate-specific barcodes.
